# Supplementary material for: Overweight: A Protective Factor against Comorbidity in the Elderly
Source: Int J Environ Res Public Health. 2019 Sep 29;16(19):3656. doi: 10.3390/ijerph16193656 (PMC6801595; doi:10.3390/ijerph16193656)
Supplement: Supplementary file 1 [file ijerph-16-03656-s001.pdf]

**Table S1.** Demographic and anthropometric features of study participants according to comorbidity category.

| Variables                                | Number of Conditions in Addition to the Main Illness |               |               |
|------------------------------------------|------------------------------------------------------|---------------|---------------|
|                                          | None                                                 | 1–2           | ≥3            |
| Number of patients selected for analysis | 2069 (22.8%)                                         | 4007 (44.2%)  | 2991 (33.0%)  |
| Age (years, mean ± SD <sup>1</sup> )     | 39.26 ± 13.81                                        | 51.08 ± 15.92 | 62.95 ± 12.81 |
| Sex                                      |                                                      |               |               |
| Female                                   | 1244 (60.1%)                                         | 2631 (65.7%)  | 2049 (68.5%)  |
| Male                                     | 825 (39.9%)                                          | 1376 (34.3%)  | 942 (31.5%)   |
| Area of residence                        |                                                      |               |               |
| Urban                                    | 1082 (52.3%)                                         | 1979 (49.4%)  | 1421 (47.5%)  |
| Rural                                    | 987 (47.7%)                                          | 2028 (50.6%)  | 1570 (52.5%)  |
| Marital status                           |                                                      |               |               |
| Single                                   | 892 (43.1%)                                          | 1093 (27.3%)  | 491 (16.4%)   |
| Married                                  | 1086 (52.5%)                                         | 2507 (62.5%)  | 1991 (66.6%)  |
| Widowed                                  | 43 (2.1%)                                            | 255 (6.4%)    | 380 (12.7%)   |
| Divorced                                 | 48 (2.3%)                                            | 152 (3.8%)    | 129 (4.3%)    |
| Smoking habits                           |                                                      |               |               |
| Never smoker                             | 1103 (53.3%)                                         | 2140 (53.4%)  | 1562 (52.2%)  |
| Current smoker                           | 289 (14.0%)                                          | 640 (16.0%)   | 560 (18.7%)   |
| Former smoker                            | 677 (32.7%)                                          | 1227 (30.6%)  | 869 (29.1%)   |
| Hospitalization                          |                                                      |               |               |
| Outpatients                              | 1877 (90.7%)                                         | 3179 (79.3%)  | 1931 (64.6%)  |
| Inpatients                               | 192 (9.3%)                                           | 828 (20.7%)   | 1060 (35.4%)  |
| BMI <sup>2</sup> (kg/m <sup>2</sup> )    |                                                      |               |               |
| < 25.0                                   | 1278 (61.8%)                                         | 2631 (65.7%)  | 1733 (58.0%)  |
| 25.0–27.4                                | 629 (30.4%)                                          | 808 (20.1%)   | 559 (18.7%)   |
| 27.5–29.9                                | 94 (4.5%)                                            | 340 (8.5%)    | 324 (10.8%)   |
| ≥ 30.0                                   | 68 (3.3%)                                            | 228 (5.7%)    | 375 (12.5%)   |

SD <sup>1</sup>, standard deviation, BMI <sup>2</sup>, body mass index.
